# Supplementary material
Source: PubMed Central journal article supplement (PMC3911493)
Supplement: MCB.01337-13_zmb999100303so1.pdf [file MCB.01337-13_zmb999100303so1.pdf]

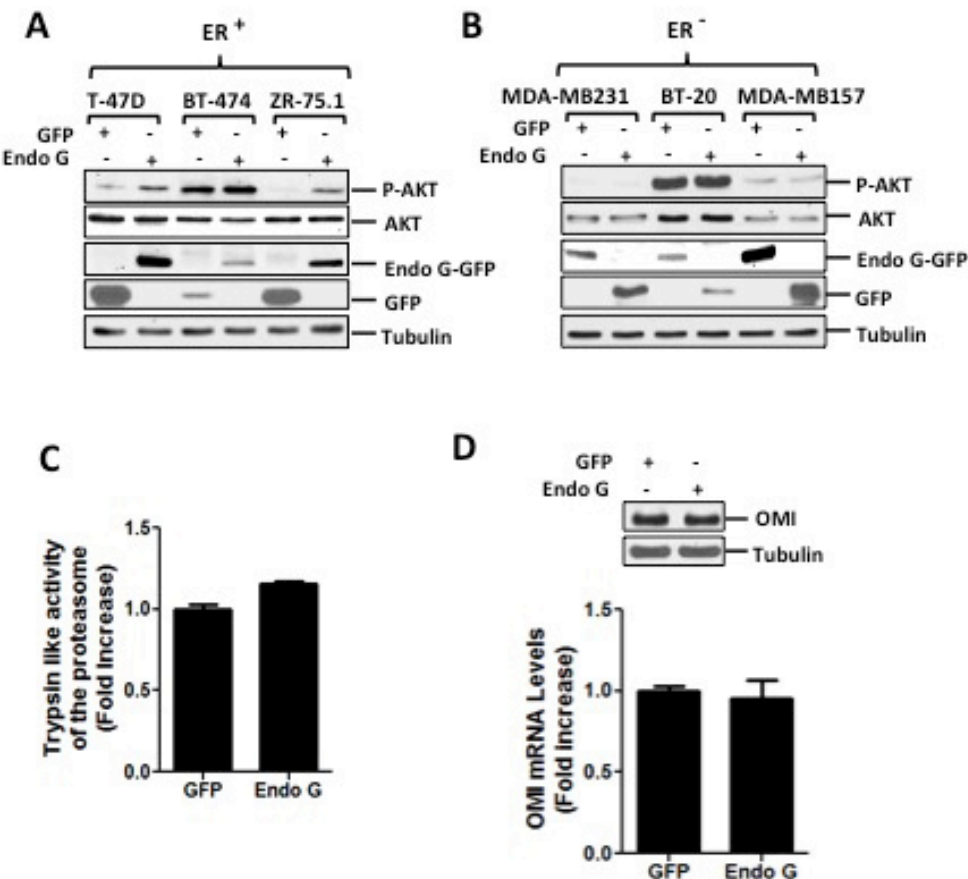

**Figure S1.** ER $\alpha$ -negative breast cancer cells fail to activate AKT and the outcomes of the ER $\alpha$ - arm of the UPR<sup>mt</sup> in response to proteotoxic stress. **(A)** Phosphorylation of AKT (Ser473) was evaluated in a panel of ER $\alpha$ -positive cell lines transiently transfected with the indicated plasmids. Levels of the endogenous AKT as well as the exogenous Endo G and GFP were tested by western blotting using anti-AKT and GFP antibody, respectively. **(B)** Cellular crude extracts from a panel of ER $\alpha$ -negative cell lines transfected as indicated were examined as described in A. **(C)** Proteasomal trypsin-like activities were assayed in cells overexpressing either the control GFP or mutant EndoG-GFP as described in the Materials and Methods section. **(D)** Transcript levels of OMI were evaluated by qRT PCR in MDA-MB 231 cells transfected with the indicated plasmids for 24hrs. Data represent the mean  $\pm$  SD of mRNA in transfected cells relative to control cells. Omi levels were detected by western blotting.

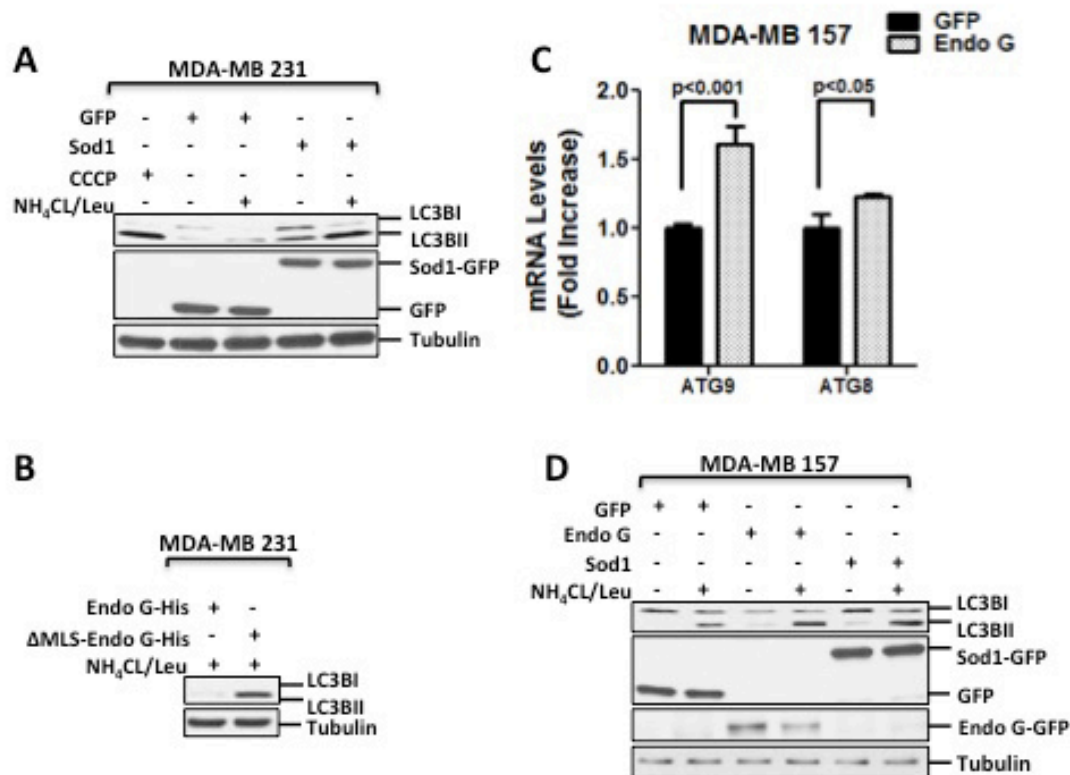

**Figure S2.** Autophagy is triggered by a variety of misfolded mitochondrial proteins. **(A)** MDA-MB 231 cells were treated with 10 $\mu$ M CCCP overnight or transfected with either mutant SOD1-GFP (G93A) or GFP empty vector for 48hrs followed by treatment with a combination of NH<sub>4</sub>CL (20 $\mu$ M) and Leupeptin (0.1 mM) for 3hrs prior to harvesting. Protein extracts were subjected to western blotting to determine levels of lipidated LC3B II. Transfection of GFP and SOD1-GFP was confirmed by western blotting using anti-GFP antibody. **(B)** Crude extracts from MDA-MB 231 cells overexpressing the indicated plasmids in the presence or absence of NH<sub>4</sub>CL/Leu combination for 3hrs were analyzed by western blotting at 48hrs time point for levels of lipidated form of LC3B. **(C)** mRNA levels of ATG9 and ATG8 were assessed by qRT PCR in MDA-MB 157 cells transfected as described in A. Data represent the mean  $\pm$  SD of mRNA fold increase relative to control cells.  $P < 0.001$ ;  $P < 0.05$  indicates significant increase in mRNA levels in cells transfected with mutant Endo G-GFP versus GFP overexpressing cells. **(D)** Lysates from MDA-MB 157 cells transfected with the indicated plasmids were analyzed by western blotting for lipidated LC3B levels. Transfection of MDA-MB157 cells with GFP, Endo G-GFP and SOD1-GFP was confirmed as described in A.
